# Supplementary material for: A high-throughput test enables specific detection of hepatocellular carcinoma
Source: Springer Nature journal article supplement (doi:10.1038/s41467-023-39055-7), 2023-06-07
Supplement: MOESM1 [file 41467_2023_39055_MOESM1_ESM.pdf]

A. HCC Detect

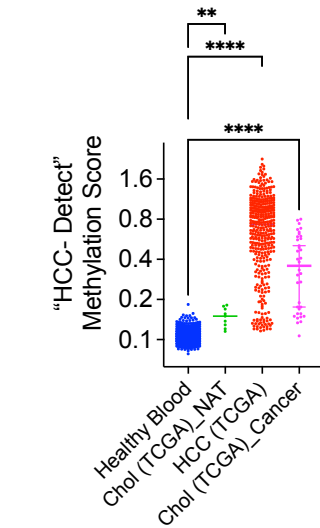

B. HCC Spec

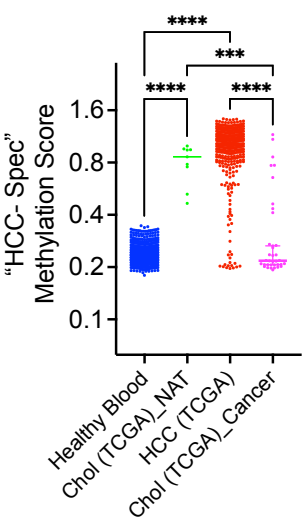

Cholangiocarcinoma (n=36) vs blood (n=968)

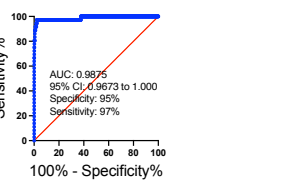

Cholangiocarcinoma (n=36) vs blood (n=968)

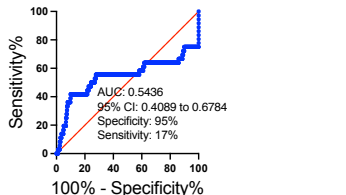

Cholangiocarcinoma (n=36) vs HCC (n=380)

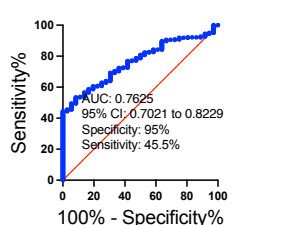

Cholangiocarcinoma (n=36) vs HCC (n=380)

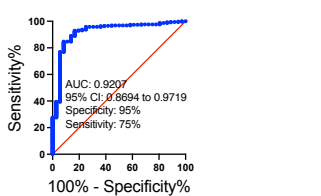

Cholangiocarcinoma (n=36) vs NAT (n=9)

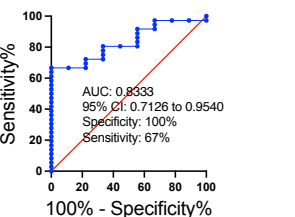

Cholangiocarcinoma (n=36) vs NAT (n=9)

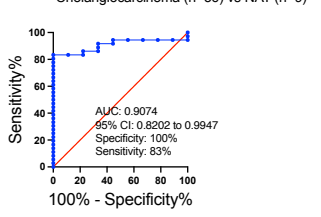

**Supplementary Figure 1. Differential methylation of “HCC-detect” and “HCC-spec” CpGs in healthy blood, NAT, HCC and intrahepatic cholangiocarcinoma.**

Scatterplot of the “HCC-detect” (A, upper panel) and “HCC-spec” (B-upper panel) for each of the samples in the healthy blood (n=968), NAT (TCGA, n=9) and intrahepatic Cholangiocarcinoma (TCGA, n=36) and HCC (TCGA, n=380) groups. ROC curve of “HCC-detect” (A, lower panel) and “HCC-spec” (B, lower panel) in healthy blood, NAT, and intrahepatic cholangiocarcinoma. Figure A and B shows scatterplots for comparisons with a P value of 0.05 or less, indicating that differences between groups are only considered significant if they meet this threshold. Any comparisons with a higher P value are not displayed. Kruskal-Wallis nonparametric one-way ANOVA with Dunn’s multiple comparisons test was used to compare the groups. The line at the median with 95% confidence interval is shown in the plot. Source data are provided as a Source Data file.

A.

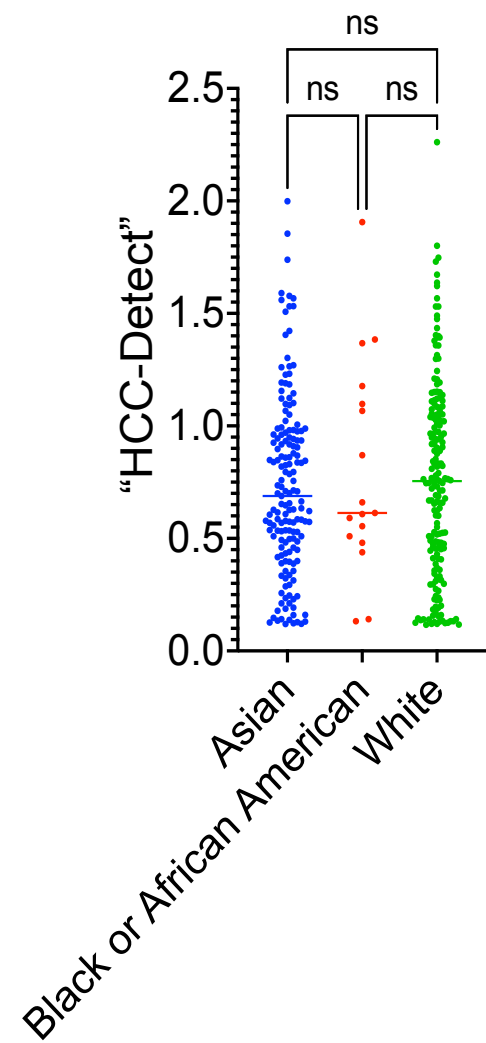

B.

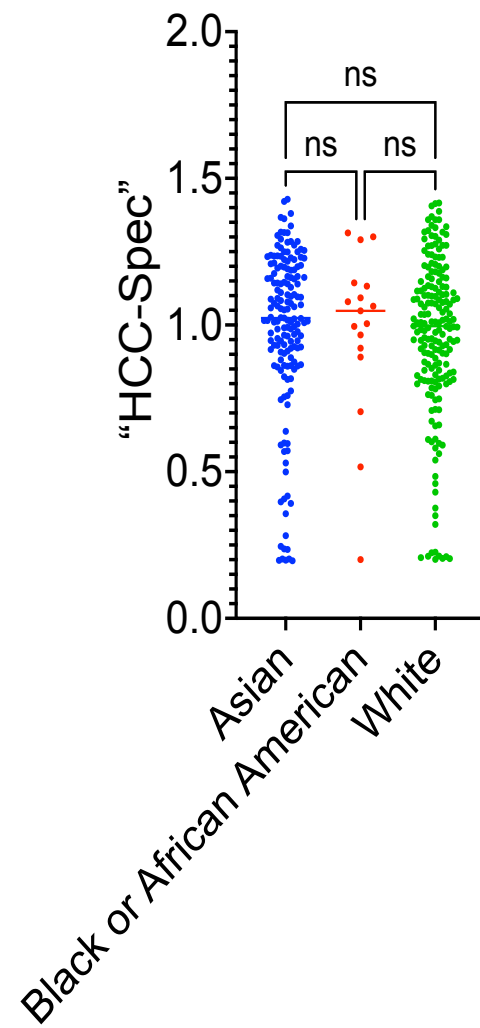

**Supplementary Figure 2. Scatterplot of the “HCC-detect” (A) and “HCC-spec” (B) for each of the samples in the HCC Asian, black or African American and white people (TCGA, n=365).** Kruskal-Wallis nonparametric one-way ANOVA with Dunn’s multiple comparisons test was used to compare the groups. Source data are provided as a Source Data file.

A

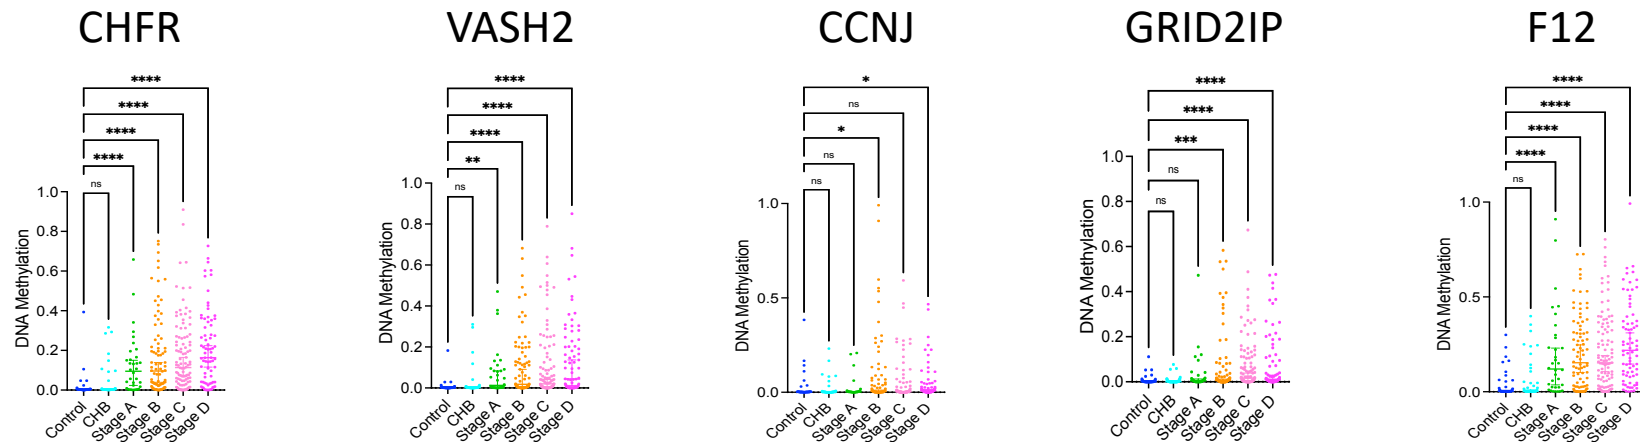

B

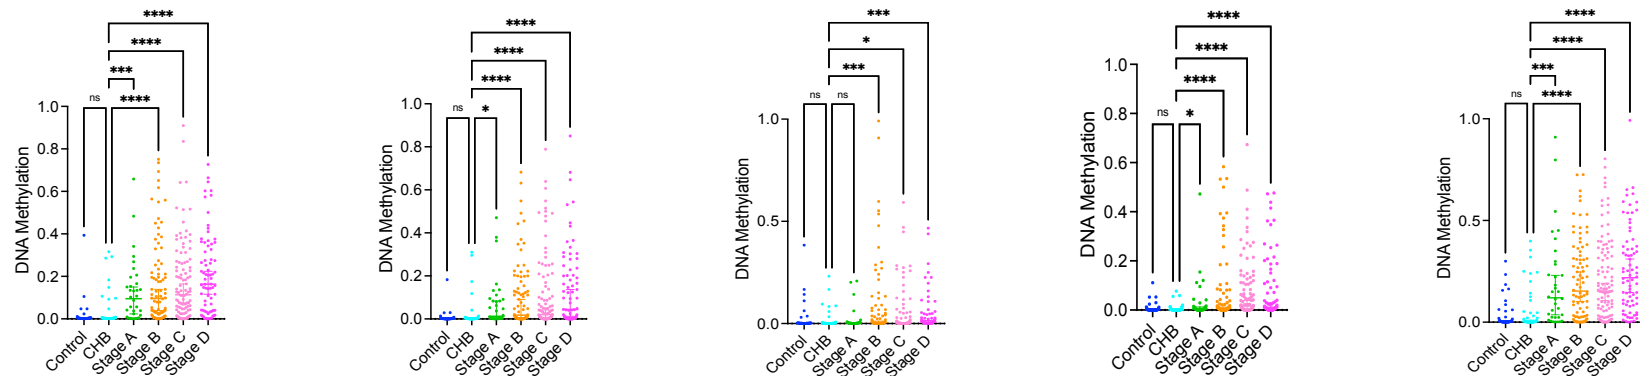

C

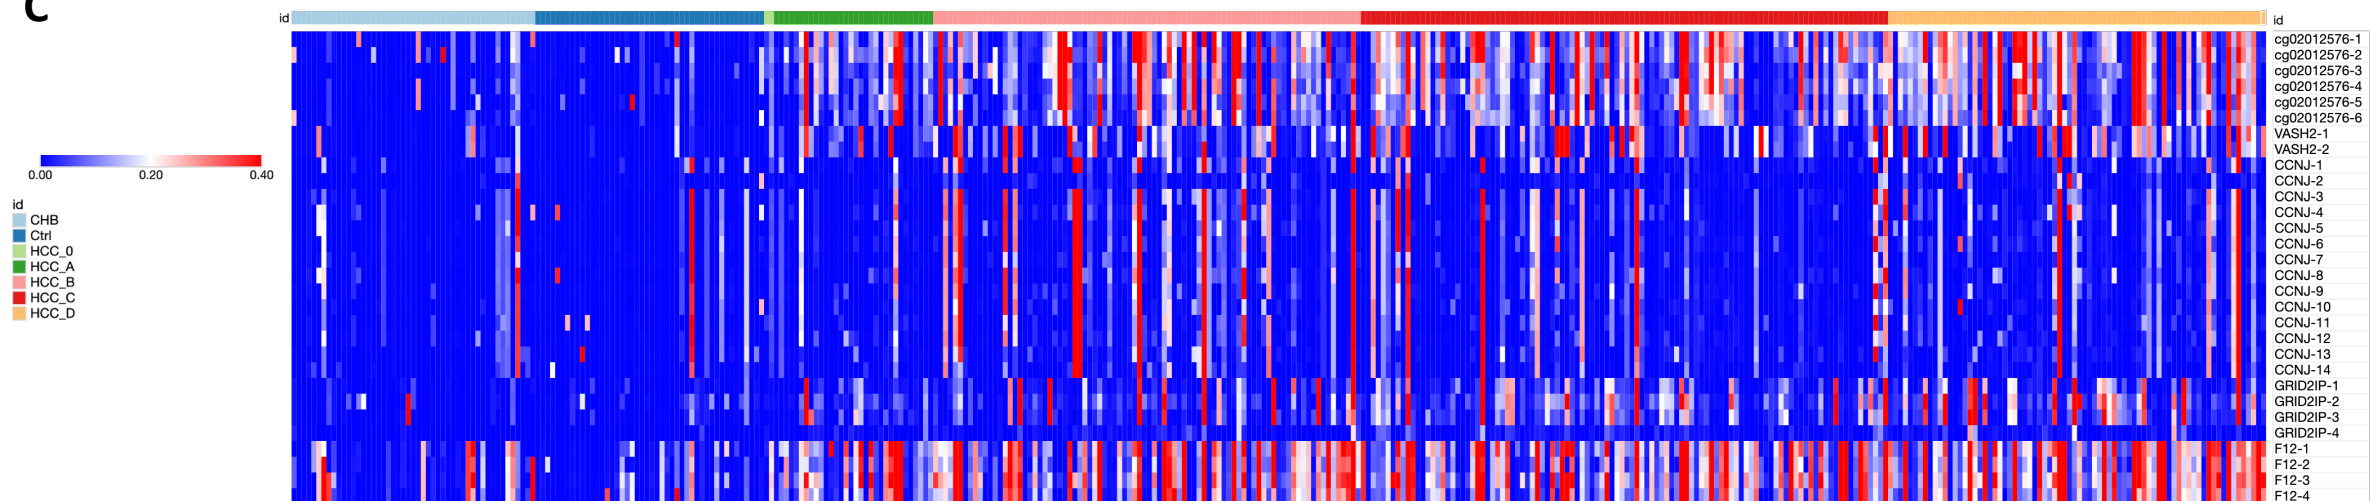

**Supplementary Figure 3. Differential methylation of “HCC-detect” and “HCC-spec” CpGs at different stages of HCC in the Dhaka clinical study.** Median methylation and 95%

confidence interval for the four CpGs included in the “HCC-detect” set (cg02012576 (*CHFR*), cg03768777 (*VASH2*), cg05739190 (*CCNJ*), cg24804544 (*GRID2IP*) and “HCC-spec” cg14126493 (*FI2*) with ANOVA analysis of control samples vs CHB and the four stages of cancers (n=46 for healthy controls, n=49 for CHB, Stage A, n=34, Stage B, n=86, Stage C, n=106 and Stage D, n=76. (A) and CHB vs Control and the four stages of cancers (B) (n for each group as indicated in Fig. 5). C. Heatmap illustrates the methylation values for all the CpGs included in the sequenced regions for all five genes. Figures A and B show scatterplots for comparisons with a P value of 0.05 or less, indicating that differences between groups are only considered significant if they meet this threshold. Any comparisons with a higher P value are not displayed. The line at the median with 95% confidence interval is shown in the plot.

Source data are provided as a Source Data file.

HCC-Detect

1<sup>st</sup> training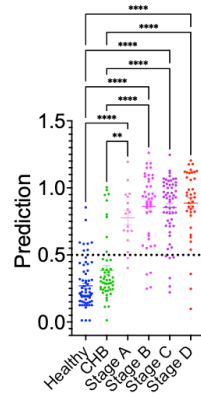2<sup>nd</sup> training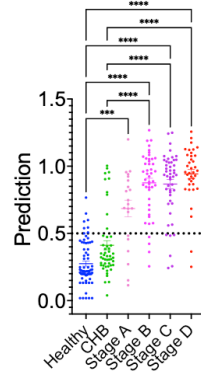3<sup>d</sup> training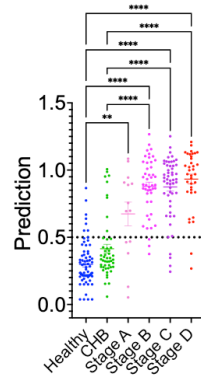

HCC-Spec

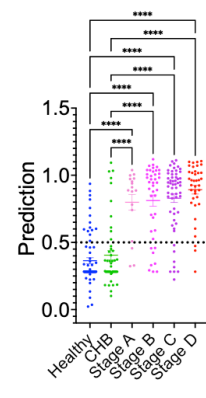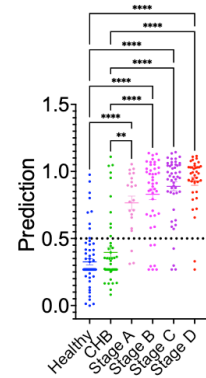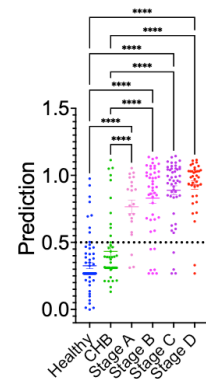

**Supplementary Figure 4. Prediction of HCC using three models which were trained on three randomly selected training subsets in randomly selected validation subset.** The charts show HCC prediction (0 and 1) for each model in plasma cfDNA samples from different stages of HCC, nonHCC cancers, CHB and nonaffected controls. Figure shows scatterplots for comparisons with a P value of 0.05 or less, indicating that differences between groups are only considered significant if they meet this threshold. Any comparisons with a higher P value are not displayed.

Significance was determined by Kruskal-Wallis nonparametric one-way ANOVA with Dunn's multiple comparisons test (\*\*\*\*  $p < 0.0001$ , \*\*\*  $p < 0.001$ , \*\*  $p < 0.01$ , \* $p < 0.05$ , n.s. nonsignificant). Sample sizes after cross-validation were  $n=70$  for healthy controls,  $n=49$  for CHB, Stage A,  $n=17$ , Stage B,  $n=41$ , Stage C,  $n=57$  and Stage D,  $n=38$  (the sample sizes were obtained after splitting the cohort into validation and training sets.). The line at the median with 95% confidence interval is shown in the plot. Source data are provided as a Source Data file.



# Supplementary Table S1

Cancer and NAT samples analyzed from TCGA

| Study Abbreviation | Study Name                                                       | Cancer Subject number | NAT subject number | Total |
|--------------------|------------------------------------------------------------------|-----------------------|--------------------|-------|
| ACC                | Adrenocortical carcinoma                                         | 80                    | 0                  | 80    |
| BLCA               | Bladder Urothelial Carcinoma                                     | 417                   | 21                 | 438   |
| BRCA               | Breast invasive carcinoma                                        | 796                   | 95                 | 891   |
| CESC               | Cervical squamous cell carcinoma and endocervical adenocarcinoma | 309                   | 3                  | 312   |
| CHOL               | Cholangiocarcinoma                                               | 36                    | 9                  | 45    |
| COAD               | Colon adenocarcinoma                                             | 414                   | 38                 | 452   |
| ESCA               | Esophageal carcinoma                                             | 186                   | 16                 | 202   |
| GBM                | Glioblastoma multiforme                                          | 153                   | 2                  | 155   |
| HNSC               | Head and Neck squamous cell carcinoma                            | 530                   | 50                 | 580   |
| KICH               | Kidney Chromophobe                                               | 66                    | 0                  | 66    |
| KIRC               | Kidney renal clear cell carcinoma                                | 325                   | 159                | 484   |
| KIRP               | Kidney renal papillary cell carcinoma                            | 276                   | 45                 | 321   |
| LAML               | Acute Myeloid Leukemia                                           | 140                   | 0                  | 140   |
| LGG                | Brain Lower Grade Glioma                                         | 534                   | 0                  | 534   |
| LIHC               | Liver hepatocellular carcinoma                                   | 380                   | 50                 | 430   |
| LUAD               | Lung adenocarcinoma                                              | 411                   | 22                 | 433   |
| LUSC               | Lung squamous cell carcinoma                                     | 337                   | 36                 | 373   |
| MESO               | Mesothelioma                                                     | 87                    | 0                  | 87    |
| OV                 | Ovarian serous cystadenocarcinoma                                | 10                    | 0                  | 10    |
| PAAD               | Pancreatic adenocarcinoma                                        | 185                   | 10                 | 195   |
| PCPG               | Pheochromocytoma and Paraganglioma                               | 184                   | 3                  | 187   |
| PRAD               | Prostate adenocarcinoma                                          | 503                   | 50                 | 553   |
| READ               | Rectum adenocarcinoma                                            | 99                    | 7                  | 106   |
| SARC               | Sarcoma                                                          | 265                   | 4                  | 269   |
| SKCM               | Skin Cutaneous Melanoma                                          | 473                   | 2                  | 475   |
| STAD               | Stomach adenocarcinoma                                           | 394                   | 2                  | 396   |
| TGCT               | Testicular Germ Cell Tumors                                      | 156                   | 0                  | 156   |
| THCA               | Thyroid carcinoma                                                | 515                   | 56                 | 571   |
| THYM               | Thymoma                                                          | 124                   | 2                  | 126   |
| UCEC               | Uterine Corpus Endometrial Carcinoma                             | 439                   | 45                 | 484   |
| UCS                | Uterine Carcinosarcoma                                           | 57                    | 0                  | 57    |
| UVM                | Uveal Melanoma                                                   | 80                    | 0                  | 80    |
| Total              |                                                                  | 8961                  | 727                | 9688  |

**Supplementary Table S1.** List and number of samples and acronyms for cancers analyzed from TCGA.

## Supplementary Table S2

ROCs for “HCC-detect” sum and “HCC-spec” + “HCC-detect” sum scores and number of samples with methylation values larger than 0.2

| Test Type                               |                      | ROC     | sensitivity | specificity |       |
|-----------------------------------------|----------------------|---------|-------------|-------------|-------|
| HCC detect sum                          | HCC blood            | 0.993   | 95          | 97          |       |
|                                         | HCC other normal     | 0.948   | 84          | 95          |       |
|                                         | HCC blood and normal | 0.985   | 91          | 95          |       |
|                                         | HCC NAT              | 0.919   | 85          | 95          |       |
| HCC detect +spec sum                    | HCC blood            | 0.998   | 99          | 99          |       |
|                                         | HCC other normal     | 0.996   | 95          | 98          |       |
|                                         | HCC blood an normal  | 0.996   | 97          | 98          |       |
|                                         | HCC NAT              | 0.966   | 92          | 95          |       |
| Number of samples with methylation >0.2 |                      |         |             |             |       |
| Sample Group                            | Vash2                | GRID2IP | CHFR        | CCNJ        | F12   |
| HCC                                     | 420                  | 332     | 388         | 305         | 747   |
| Other blood normal no HCC               | 0                    | 1       | 5           | 0           | 0     |
|                                         | 0.587                | 0.502   | 0.579       | 0.442       | 0.968 |

**Supplementary Table S2.** ROC and Methylation Data for HCC Detection

ROC for “HCC-detect” sum “HCC-spec” + “HCC-detect” sum scores and number of samples with methylation values larger than 0.2.

## Supplementary Table S3

HCC Spec Model: Statistical Analysis Summary

| Category              | Statistic         | Value   | Intercept | cg14126493 |
|-----------------------|-------------------|---------|-----------|------------|
| Regression Statistics | Multiple R        | 0.7987  |           |            |
|                       | R Square          | 0.638   |           |            |
|                       | Adjusted R Square | 0.6337  |           |            |
|                       | Standard Error    | 0.2572  |           |            |
|                       | Observations      | 86      |           |            |
| ANOVA                 | df (Regression)   | 1       |           |            |
|                       | df (Residual)     | 84      |           |            |
|                       | SS (Regression)   | 9.792   |           |            |
|                       | SS (Residual)     | 5.557   |           |            |
|                       | MS (Regression)   | 9.792   |           |            |
|                       | MS (Residual)     | 0.066   |           |            |
|                       | F                 | 148.034 |           |            |
|                       | Significance F    | 0       |           |            |
| Coefficients          | Coefficient       |         | 0.179     | 1.347      |
|                       | Standard Error    |         | 0.056     | 0.111      |
|                       | t Stat            |         | 3.222     | 12.167     |
|                       | P-value           |         | 0.002     | 0          |
|                       | Lower 95%         |         | 0.069     | 1.127      |
|                       | Upper 95%         |         | 0.29      | 1.567      |

**Supplementary Table S3.** Model statistics for “HCC-spec”.

The table shows the results of the HCC spec model statistics obtained using the Analysis ToolPak in Microsoft Excel. The table provides information on the regression statistics, including multiple R, R squared, and adjusted R squared, as well as the ANOVA and coefficient values for the intercept and cg14126493. The analysis revealed a significant relationship between cg14126493 and a weighted methylation score for F12 ( $F = 148.034$ ,  $p < 0.0001$ )

## Supplementary Table S4

Statistical significance median HCC-detect M-scores between healthy controls, healthy plasma, CHB, non-HCC cancers and four stages of HCC.

|         | Control | CHB | Stage A | Stage B | Stage C | Stage D | non-HCC cancers |
|---------|---------|-----|---------|---------|---------|---------|-----------------|
| Healthy | ns      | ns  | ***     | ****    | ****    | ****    | ns              |
| Control |         | ns  | ***     | ****    | ****    | ****    | ns              |
| CHB     |         |     | *       | ****    | ****    | ****    | *               |
| Stage A |         |     |         | ns      | ns      | ns      | ****            |
| Stage B |         |     |         |         | ns      | ns      | ****            |
| Stage C |         |     |         |         |         | ns      | ****            |
| Stage D |         |     |         |         |         |         | ****            |

**Supplementary Table S4** Median HCC-detect M-score comparison among healthy, CHB, non-HCC cancers, and different stages of HCC

Statistical significance between median HCC-detect M-scores of healthy controls (n=46), healthy plasma (n=50), CHB (n=49), non-HCC cancers (n=102), and four stages of HCC (Stage A+O, n=34, Stage B, n=86, Stage C, n=106 and Stage D, n=76). See Figure 5D.



Statistical significance median HCC-spec M-scores between  
between healthy controls, healthy plasma, CHB, non-HCC  
cancers and four stages of HCC.

**Supplementary Table S5**

|         | Control | CHB | Stage A | Stage B | Stage C | Stage D | non-HCC<br>cancers |
|---------|---------|-----|---------|---------|---------|---------|--------------------|
| Healthy | ns      | ns  | ****    | ****    | ****    | ****    | ns                 |
| Control |         | ns  | ****    | ****    | ****    | ****    | ns                 |
| CHB     |         |     | ****    | ****    | ****    | ****    | ns                 |
| Stage A |         |     |         | ns      | ns      | ns      | ****               |
| Stage B |         |     |         |         | ns      | ns      | ****               |
| Stage C |         |     |         |         |         | ns      | ****               |
| Stage D |         |     |         |         |         |         | ****               |

**Supplementary Table S5** Statistical significance of HCC-specific methylation scores among different groups and stages.

Statistical significance between median HCC-spec M-scores of healthy controls, healthy plasma, CHB, non-HCC cancers, and four stages of HCC. See Figure 5F.

Statistical significance of "HCC-detect" predicted probabilities  
(0 to 1) between the samples from the Dhaka clinical study and  
healthy plasma from Innovative™ Research

**Supplementary Table S6**

|         | Control | CHB | Stage A | Stage B | Stage C | Stage D | non-HCC<br>cancers |
|---------|---------|-----|---------|---------|---------|---------|--------------------|
| Healthy | ns      | ns  | ***     | ****    | ****    | ****    | ns                 |
| Control |         | ns  | ***     | ****    | ****    | ****    | ns                 |
| CHB     |         |     | *       | ****    | ****    | ****    | *                  |
| Stage A |         |     |         | ns      | ns      | ns      | ****               |
| Stage B |         |     |         |         | ns      | ns      | ****               |
| Stage C |         |     |         |         |         | ns      | ****               |
| Stage D |         |     |         |         |         |         | ****               |

**Supplementary Table S6**

Statistical significance of predicted probabilities (0 to 1) between the samples from the Dhaka clinical study and healthy plasma from Innovative<sup>TM</sup> Research calculated using the logistic regression equation for the “HCC-detect” M scores. See Figure 6C

Statistical significance "HCC-spec" of sum probabilities scores for the 50 healthy plasma (Innovative™ Research), healthy controls, chronic hepatitis B 102 non-HCC cancer patients and four stages of HCC.

**Supplementary Table S7**

|         | Control | CHB | Stage A | Stage B | Stage C | Stage D | non-HCC cancers |
|---------|---------|-----|---------|---------|---------|---------|-----------------|
| Healthy | ns      | ns  | ****    | ****    | ****    | ****    | ns              |
| Control |         | ns  | ***     | ****    | ****    | ****    | ns              |
| CHB     |         |     | ****    | ****    | ****    | ****    | ns              |
| Stage A |         |     |         | ns      | ns      | ns      | ****            |
| Stage B |         |     |         |         | ns      | ns      | ****            |
| Stage C |         |     |         |         |         | ns      | ****            |
| Stage D |         |     |         |         |         |         | ****            |

**Supplementary Table S7** Logistic regression analysis of HCC detection in Dhaka clinical study and healthy plasma.

Statistical significance of sum probabilities scores for the 50 healthy plasma (Innovative<sup>TM</sup> Research), healthy controls, chronic hepatitis B 102 non-HCC cancer patients and four stages of HCC for “HCC-spec” M scores. See Figure 6F

Statistical significance of predicted probabilities (0 to 1)  
between the samples from the Dhaka clinical study and  
healthy plasma from Innovative™ Research

**Supplementary Table S8**

|         | Control | CHB | Stage A | Stage B | Stage C | Stage D | non-HCC<br>cancers |
|---------|---------|-----|---------|---------|---------|---------|--------------------|
| Healthy | ns      | ns  | ****    | ****    | ****    | ****    | ns                 |
| Control |         | ns  | ****    | ****    | ****    | ****    | ns                 |
| CHB     |         |     | ***     | ****    | ****    | ****    | ns                 |
| Stage A |         |     |         | ns      | ns      | ns      | ****               |
| Stage B |         |     |         |         | ns      | ns      | ****               |
| Stage C |         |     |         |         |         | ns      | ****               |
| Stage D |         |     |         |         |         |         | ****               |

**Supplementary Table S8** Significance of predicted probabilities for Dhaka clinical study  
samples vs. healthy plasma using HCC-spec M scores

Statistical significance of predicted probabilities (0 to 1) between the samples from the Dhaka clinical study and healthy plasma from Innovative<sup>TM</sup> Research calculated using the logistic regression equation for the “HCC-spec” M scores.



## Supplementary Table S9

HCC Detect Model: Statistical Analysis Summary

| Category              | Statistic         | Value   | Intercept | cg03768777 | cg24804544 | cg05739190 | cg02012576 |
|-----------------------|-------------------|---------|-----------|------------|------------|------------|------------|
| Regression Statistics | Multiple R        | 0.811   |           |            |            |            |            |
|                       | R Square          | 0.657   |           |            |            |            |            |
|                       | Adjusted R Square | 0.648   |           |            |            |            |            |
|                       | Standard Error    | 0.297   |           |            |            |            |            |
|                       | Observations      | 145     |           |            |            |            |            |
| ANOVA                 | df (Regression)   | 4       |           |            |            |            |            |
|                       | df (Residual)     | 140     |           |            |            |            |            |
|                       | SS (Regression)   | 23.639  |           |            |            |            |            |
|                       | SS (Residual)     | 12.32   |           |            |            |            |            |
|                       | MS (Regression)   | 5.91    |           |            |            |            |            |
|                       | MS (Residual)     | 0.088   |           |            |            |            |            |
|                       | F                 | 67.159  |           |            |            |            |            |
|                       | Significance F    | 1.3E-31 |           |            |            |            |            |
| Coefficients          | Coefficient       |         | 0.064     | 0.751      | 0.427      | 0.64       | 0.804      |
|                       | Standard Error    |         | 0.035     | 0.159      | 0.137      | 0.136      | 0.18       |
|                       | t Stat            |         | 1.86      | 4.731      | 3.116      | 4.718      | 4.474      |
|                       | P-value           |         | 0.065     | 0          | 0.002      | 0          | 0          |
|                       | Lower 95%         |         | -0.004    | 0.437      | 0.156      | 0.372      | 0.449      |
|                       | Upper 95%         |         | 0.132     | 1.065      | 0.698      | 0.908      | 1.16       |
| Model Performance     | Sensitivity       | 0.985   |           |            |            |            |            |
|                       | Specificity       | 1       |           |            |            |            |            |
|                       | Cutoff            | 0.24    |           |            |            |            |            |
|                       | Accuracy          | 0.993   |           |            |            |            |            |
|                       | AUC               | 0.991   |           |            |            |            |            |

**Supplementary Table S9.** Model statistics for “HCC-detect”.

The table shows the results of the HCC detect model statistics obtained using the Analysis ToolPak in Microsoft Excel. The table provides information on the regression statistics, including multiple R, R squared, and adjusted R squared, as well as the ANOVA and coefficient values for the intercept and four CpG sites (cg03768777, cg24804544, cg05739190, and cg02012576). The analysis revealed a significant relationship between the CpG sites and a weighted methylation score for HCC detection ( $F = 67.159$ ,  $p < 0.0001$ ). In addition, the table includes performance metrics of the HCC detect model, including sensitivity, specificity, cutoff value, accuracy, and AUC.

**Supplementary Table S10**

Summary of 102 Non-HCC study participants

| <b>Cancer Groups</b>          | <b>Total N of Enrolled</b> | <b>Stage 1</b> | <b>Stage 2</b> | <b>Stage 3</b> | <b>Stage 4</b> |
|-------------------------------|----------------------------|----------------|----------------|----------------|----------------|
| Bladder Cancer                | 4                          | 0              | 1              | 2              | 1              |
| Breast Cancer                 | 16                         | 2              | 7              | 7              | 0              |
| Cervical Cancer               | 12                         | 0              | 5              | 6              | 1              |
| Head and Neck Squamous Cancer | 11                         | 0              | 2              | 4              | 5              |
| Lung Cancer                   | 17                         | 0              | 1              | 10             | 6              |
| Colon Cancer                  | 19                         | 3              | 3              | 13             | 0              |
| Esophageal Carcinoma          | 7                          | 0              | 0              | 6              | 1              |
| Ovarian Cancer                | 6                          | 1              | 0              | 4              | 1              |
| Prostate Cancer               | 1                          | 0              | 1              | 0              | 0              |
| Gastric Cancer                | 5                          | 0              | 1              | 2              | 2              |
| Gall Bladder Cancer           | 1                          | 0              | 0              | 0              | 1              |
| Renal Cell Carcinoma          | 1                          | 0              | 1              | 0              | 0              |
| Thyroid Cancer                | 1                          | 1              | 0              | 0              | 0              |
| Soft Tissue Sarcoma           | 1                          | 0              | 0              | 1              | 0              |

**Supplementary Table S10.** Summary of 102 Non-HCC study participants, presenting the number of enrolled participants in each cancer group and the stage of cancer at the time of enrollment.

**Supplementary Table S11** Cross Validation Model Performance Metrics

| Training # | R2 | RMSE | MAE  |
|------------|----|------|------|
| 1          | 1  | 3.25 | 2.85 |
| 2          | 1  | 3.25 | 2.83 |
| 3          | 1  | 3.24 | 2.83 |

\*R2- R-Squared

\*RMSE is the Root of the Mean of the Square of Errors

\*MAE- Mean Absolute Error

**Supplementary Table S11.** Cross-validation model performance metrics for three training runs.

The table shows the R-squared ( $R^2$ ), root mean square error (RMSE), and mean absolute error (MAE) values for each training run. RMSE is calculated as the root of the mean of the square of errors.
